# Supplementary material for: Timing Differences in Stride Cycle Phases in Retired Racehorses Ridden in Rising and Two-Point Seat Positions at Trot on Turf, Artificial and Tarmac Surfaces
Source: MDPI journal article supplement (doi:10.3390/ani13162563), 2023-08-09
Supplement: s1 [file s1]

# Timing Differences in Stride Cycle Phases in Retired Racehorses Ridden in Rising and Two-Point Seat Positions at Trot on Turf, Artificial and Tarmac Surfaces

Kate Horan <sup>1\*</sup>, Haydn Price <sup>2</sup>, Peter Day <sup>1</sup>, Russell Mackechnie-Guire <sup>3</sup> and Thilo Pfau <sup>4</sup>

## Supplementary Information

**Table S1** Vertical movement asymmetry data for horses trotting in-hand on tarmac summarized by the parameters MinDiff, MaxDiff, UpDiff and range of movement (ROM). L1 – lumbar vertebra 1, TC – left tuber coxae, RTC – right tuber coxae.

| Variable | Horse | Stride time<br>(ms) | Number of<br>strides | MinDiff*<br>(mm) | MaxDiff§<br>(mm) | UpDiff†<br>(mm) | ROM‡<br>(mm) |
|----------|-------|---------------------|----------------------|------------------|------------------|-----------------|--------------|
| Poll     | 1     | 656                 | 22                   | -12.3            | -8.6             | 3.7             | 60.6         |
| Poll     | 2     | 714                 | 9                    | -27.3            | -2.7             | 24.6            | 79.3         |
| Poll     | 3     | 658                 | 20                   | -6.4             | 2.9              | 9.3             | 45.5         |
| Poll     | 4     | 686                 | 51                   | 1.6              | 5.6              | 4.0             | 47.2         |
| Poll     | 5     | 658                 | 32                   | -28.0            | -7.5             | 20.5            | 63.1         |
| Poll     | 6     | 651                 | 26                   | 17.7             | 14.5             | -3.2            | 62.3         |
| Withers  | 1     | 656                 | 22                   | 1.3              | -5.9             | -7.3            | 55.8         |
| Withers  | 2     | 714                 | 9                    | -8.4             | 2.8              | 11.2            | 77.0         |
| Withers  | 3     | 658                 | 20                   | -9.8             | 0.4              | 10.2            | 58.0         |
| Withers  | 4     | 686                 | 51                   | -3.7             | 3.6              | 7.3             | 60.0         |
| Withers  | 5     | 658                 | 32                   | -15.1            | -1.7             | 13.5            | 66.0         |
| Withers  | 6     | 651                 | 26                   | -4.5             | 5.7              | 10.2            | 54.1         |
| L1       | 1     | 656                 | 22                   | 6.9              | -1.5             | -8.5            | 71.0         |
| L1       | 2     | 714                 | 9                    | -5.7             | 2.8              | 8.5             | 83.6         |
| L1       | 3     | 658                 | 20                   | -10.3            | 3.9              | 14.1            | 72.2         |
| L1       | 4     | 686                 | 51                   | 0.1              | 2.2              | 2.2             | 69.7         |
| L1       | 5     | 658                 | 32                   | -5.1             | 5.2              | 10.4            | 73.9         |
| L1       | 6     | 651                 | 26                   | 2.3              | 15.8             | 13.6            | 69.7         |
| Sacrum   | 1     | 656                 | 22                   | 4.4              | -2.0             | -6.4            | 68.2         |
| Sacrum   | 2     | 714                 | 9                    | -7.7             | -0.2             | 7.6             | 77.0         |
| Sacrum   | 3     | 658                 | 20                   | -6.9             | 4.7              | 11.6            | 62.1         |
| Sacrum   | 4     | 686                 | 51                   | -6.0             | 0.8              | 6.8             | 66.9         |
| Sacrum   | 5     | 658                 | 32                   | -6.5             | 6.6              | 13.1            | 70.0         |
| Sacrum   | 6     | 651                 | 26                   | 7.0              | 18.3             | 11.3            | 72.4         |
| LTC      | 1     | 656                 | 22                   | -19.3            | 13.5             | 32.8            | 100.2        |
| LTC      | 2     | 714                 | 9                    | -37.4            | 8.4              | 45.9            | 115.4        |
| LTC      | 3     | 658                 | 20                   | -37.4            | 26.0             | 63.4            | 106.5        |
| LTC      | 4     | 686                 | 51                   | -23.6            | 22.6             | 46.2            | 105.6        |
| LTC      | 5     | 658                 | 32                   | -12.8            | 11.6             | 24.4            | 89.7         |
| LTC      | 6     | 651                 | 26                   | -8.0             | 26.1             | 34.1            | 87.0         |
| RTC      | 1     | 656                 | 22                   | 35.4             | -15.9            | -51.3           | 104.9        |
| RTC      | 2     | 714                 | 9                    | 22.8             | -4.3             | -27.1           | 101.5        |
| RTC      | 3     | 658                 | 20                   | 17.9             | -11.3            | -29.2           | 85.0         |
| RTC      | 4     | 686                 | 51                   | 19.9             | -19.5            | -39.4           | 98.4         |
| RTC      | 5     | 658                 | 32                   | 6.8              | 0.9              | -6.0            | 82.3         |
| RTC      | 6     | 651                 | 26                   | 22.4             | 7.5              | -14.9           | 87.9         |

\*MinDiff is the difference between the two displacement minima reached at approximately mid-stance.

§MaxDiff is the difference between the two displacements maxima reached at approximately mid-aerial phase.  
†UpDiff is the difference between the two upward movement amplitudes from mid-stance to mid-aerial phase.  
‡ROM, or range of movement, is the maximum amount of vertical displacement, calculated as the difference between the most positive maximum and most negative minimum.

**Table S2.** Pairwise comparisons for jockey position +surface effects on landing duration.

| Jockey position<br>+Surface A | Jockey position<br>+Surface B | Mean Difference<br>(A-B) | Std.<br>Error | df   | Sig.   | 95% Confidence In-<br>terval for Difference<br>(lower bound) | 95% Confidence In-<br>terval for Differ-<br>ence (upper bound) |
|-------------------------------|-------------------------------|--------------------------|---------------|------|--------|--------------------------------------------------------------|----------------------------------------------------------------|
| Rising+Grass                  | Rising+Tarmac                 | 53.2                     | 6.1           | 36.9 | <0.001 | 33.9                                                         | 72.4                                                           |
|                               | Rising+Artificial             | -13.1                    | 5.7           | 37.0 | 0.422  | -31.1                                                        | 4.9                                                            |
|                               | Two-point+Grass               | -3.8                     | 9.5           | 35.4 | 1      | -33.8                                                        | 26.2                                                           |
|                               | Two-point+Tarmac              | 48.8                     | 6.0           | 33.7 | <0.001 | 29.8                                                         | 67.8                                                           |
|                               | Two-point+Artificial          | 1.4                      | 6.3           | 35.5 | 1      | -18.5                                                        | 21.3                                                           |
| Rising+Tarmac                 | Rising+Grass                  | -53.2                    | 6.1           | 36.9 | <0.001 | -72.4                                                        | -33.9                                                          |
|                               | Rising+Artificial             | -66.2                    | 4.9           | 32.8 | <0.001 | -81.6                                                        | -50.9                                                          |
|                               | Two-point+Grass               | -57.0                    | 9.9           | 38.3 | <0.001 | -88.0                                                        | -25.9                                                          |
|                               | Two-point+Tarmac              | -4.3                     | 5.4           | 34.1 | 1      | -21.5                                                        | 12.8                                                           |
|                               | Two-point+Artificial          | -51.7                    | 6.4           | 36.2 | <0.001 | -71.8                                                        | -31.7                                                          |
| Rising+Artificial             | Rising+Grass                  | 13.1                     | 5.7           | 37.0 | 0.422  | -4.9                                                         | 31.1                                                           |
|                               | Rising+Tarmac                 | 66.2                     | 4.9           | 32.8 | <0.001 | 50.9                                                         | 81.6                                                           |
|                               | Two-point+Grass               | 9.3                      | 9.4           | 38.4 | 1      | -20.1                                                        | 38.6                                                           |
|                               | Two-point+Tarmac              | 61.9                     | 5.1           | 35.1 | <0.001 | 45.8                                                         | 78.0                                                           |
|                               | Two-point+Artificial          | 14.5                     | 5.6           | 34.9 | 0.207  | -3.1                                                         | 32.1                                                           |
| Two-point+Grass               | Rising+Grass                  | 3.8                      | 9.5           | 35.4 | 1      | -26.2                                                        | 33.8                                                           |
|                               | Rising+Tarmac                 | 57.0                     | 9.9           | 38.3 | <0.001 | 25.9                                                         | 88.0                                                           |
|                               | Rising+Artificial             | -9.3                     | 9.4           | 38.4 | 1      | -38.6                                                        | 20.1                                                           |
|                               | Two-point+Tarmac              | 52.6                     | 9.5           | 37.1 | <0.001 | 22.8                                                         | 82.4                                                           |
|                               | Two-point+Artificial          | 5.2                      | 9.1           | 36.8 | 1      | -23.3                                                        | 33.8                                                           |
| Two-point+Tarmac              | Rising+Grass                  | -48.8                    | 6.0           | 33.7 | <0.001 | -67.8                                                        | -29.8                                                          |
|                               | Rising+Tarmac                 | 4.3                      | 5.4           | 34.1 | 1      | -12.8                                                        | 21.5                                                           |
|                               | Rising+Artificial             | -61.9                    | 5.1           | 35.1 | <0.001 | -78.0                                                        | -45.8                                                          |
|                               | Two-point+Grass               | -52.6                    | 9.5           | 37.1 | <0.001 | -82.4                                                        | -22.8                                                          |
|                               | Two-point+Artificial          | -47.4                    | 6.1           | 37.0 | <0.001 | -66.5                                                        | -28.3                                                          |
| Two-point+Artifi-<br>cial     | Rising+Grass                  | -1.4                     | 6.3           | 35.5 | 1      | -21.3                                                        | 18.5                                                           |
|                               | Rising+Tarmac                 | 51.7                     | 6.4           | 36.2 | <0.001 | 31.7                                                         | 71.8                                                           |
|                               | Rising+Artificial             | -14.5                    | 5.6           | 34.9 | 0.207  | -32.1                                                        | 3.1                                                            |
|                               | Two-point+Grass               | -5.2                     | 9.1           | 36.8 | 1      | -33.8                                                        | 23.3                                                           |
|                               | Two-point+Tarmac              | 47.4                     | 6.1           | 37.0 | <0.001 | 28.3                                                         | 66.5                                                           |
